# Supplementary material for: Giant energy-storage density and high efficiency achieved in (Bi0.5Na0.5)TiO3–Bi(Ni0.5Zr0.5)O3 thick films with polar nanoregions
Source: Royal Society of Chemistry journal article supplement (doi:10.1039/c8tc03481h), 2018-01-01
Supplement: c8tc03481h1.pdf [file c8tc03481h1.pdf]

## Supplementary Information

### **Giant energy-storage density and high efficiency achieved in (Bi<sub>0.5</sub>Na<sub>0.5</sub>)TiO<sub>3</sub>-Bi(Ni<sub>0.5</sub>Zr<sub>0.5</sub>)O<sub>3</sub> thick films with polar nanoregions**

**Ningning Sun, Yong Li, Qiwei Zhang, and Xihong Hao\***

*Inner Mongolia Key Laboratory of Ferroelectric-related New Energy Materials and Devices, School of  
Materials and Metallurgy, Inner Mongolia University of Science and Technology, No.7 Inner Mongolia  
Arding Street, Baotou 014010, Inner Mongolia, China*

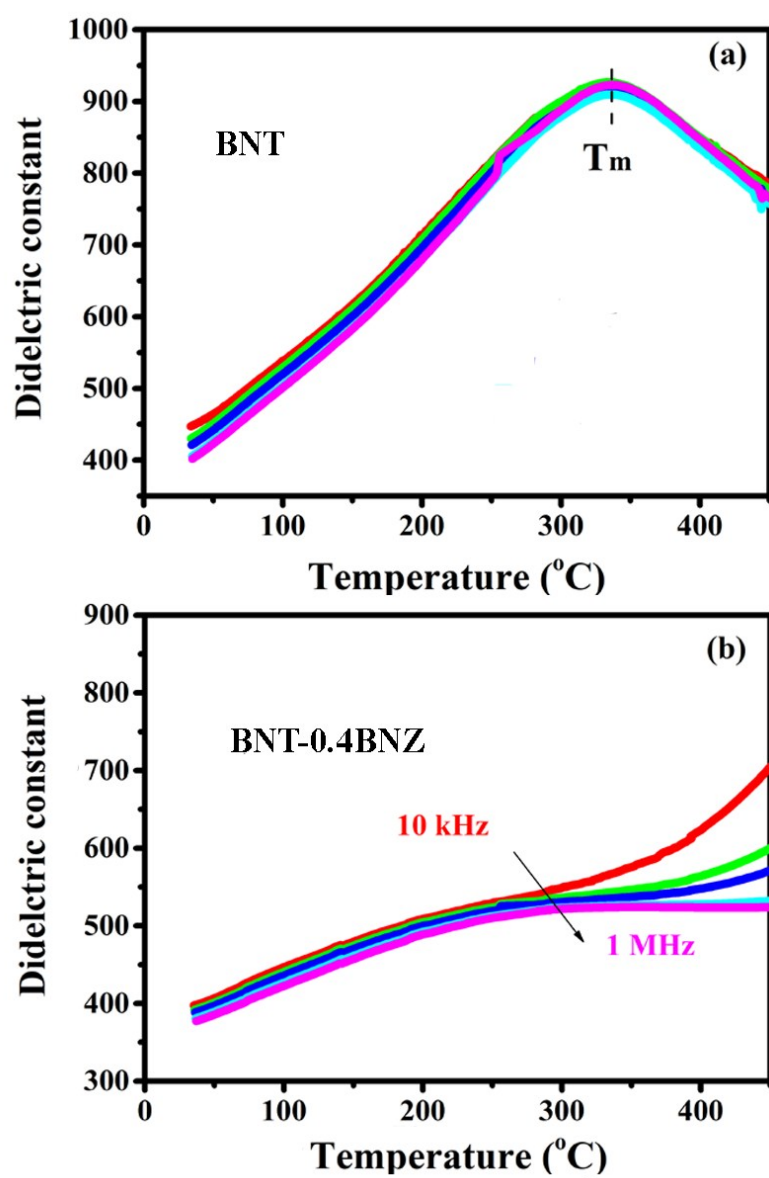

Fig. S1. Temperature dependence of the dielectric constant of the BNT (a) and BNT-0.4BNZ (b) thick films measured from 10 k to 1M Hz.

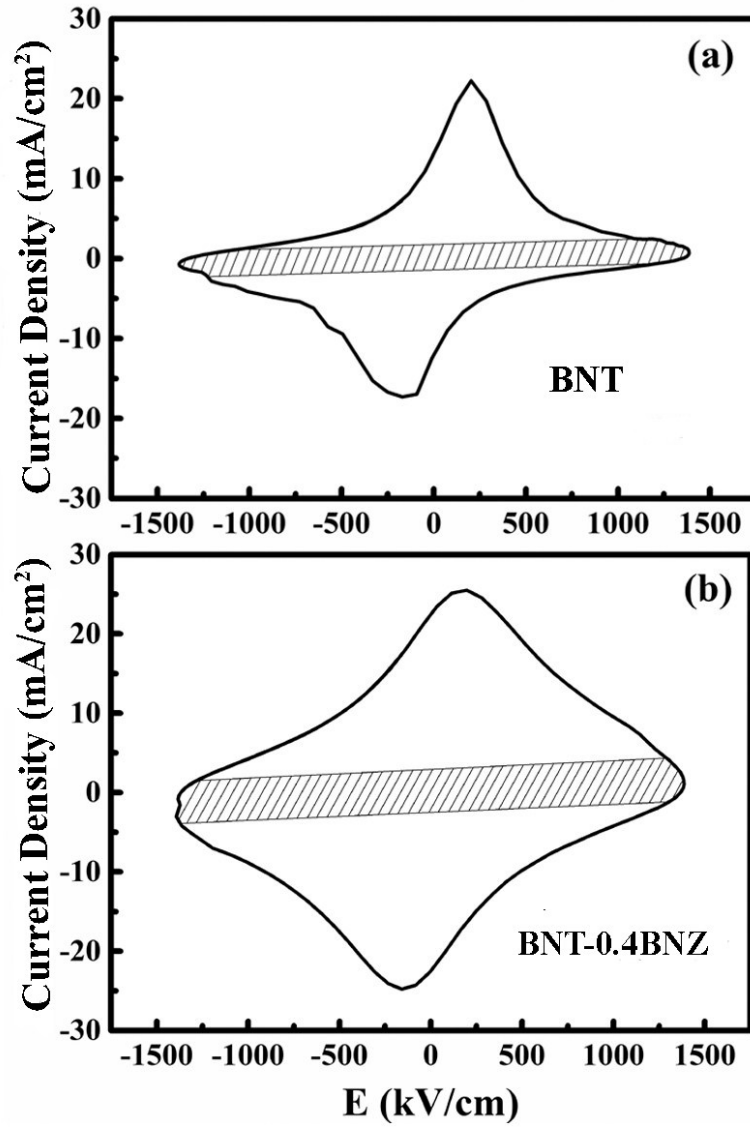

Fig. S2.  $I$ - $V$  curves of the BNT(a) and BNT-0.4BNZ(b) films at a constant cycling rate of 2800 V/s, depicting the contributions to the total dielectric displacement by electric conductivity  $D1$ , dielectric capacitance  $D2$ , and ferroelectric domain switching polarization  $P$ . The shade area represents the total contribution of  $D1$  and  $D2$ , and the remaining area is the contribution of  $P$ .
